# Supplementary material
Source: PubMed Central journal article supplement (PMC1828261)
Supplement: bjpg56-183TableS1.pdf [file bjpg56-183TableS1.pdf]

**Supplementary Table 1. Predictors of the prescription of antibiotics by Flemish GPs in adult acute cough patients. Figures are numbers (%) unless stated otherwise.<sup>a</sup>**

|                                                    | Prescribed antibiotics<br>(n = 500) <sup>a</sup> | Not prescribed antibiotics<br>(n = 948) <sup>a</sup> | Crude OR (95% CI) <sup>b</sup><br>(n = 1448) | Significance | Adjusted OR <sup>c</sup> (95% CI) <sup>b</sup><br>(n = 819) | Significance |
|----------------------------------------------------|--------------------------------------------------|------------------------------------------------------|----------------------------------------------|--------------|-------------------------------------------------------------|--------------|
| <b>Demographics</b>                                |                                                  |                                                      |                                              |              |                                                             |              |
| Mean age in years (SD)                             | 42.05 (13.03)                                    | 40.23 (13.05)                                        | 1.01 (1.00 to 1.02)                          | †            | 1.02 (1.00 to 1.04)                                         |              |
| Men                                                | 220/472 (47)                                     | 391/904 (43)                                         | 1.07 (0.90 to 1.28)                          |              | 2.20 (0.73 to 6.59)                                         |              |
| <b>Comorbidity and risk</b>                        |                                                  |                                                      |                                              |              |                                                             |              |
| Asthma                                             | 51/490 (10)                                      | 87/932 (9)                                           | 1.31 (0.97 to 1.76)                          |              | 0.52 (0.21 to 1.26)                                         |              |
| COPD                                               | 54/493 (11)                                      | 57/930 (6)                                           | 2.39 (1.57 to 3.64)                          | †            | 0.77 (0.35 to 1.69)                                         |              |
| ACE inhibitor                                      | 17/490 (3)                                       | 18/926 (2)                                           | 2.13 (1.01 to 4.49)                          | †            | 1.05 (0.26 to 4.19)                                         |              |
| Aspiration risk                                    | 6/488 (1)                                        | 8/925 (1)                                            | 2.85 (1.87 to 4.34)                          | †            | 14.79 (1.24 to 176.71)                                      | †            |
| Thromboembolic risk                                | 17/487 (3)                                       | 50/924 (5)                                           | 1.07 (0.69 to 1.64)                          |              | 0.55 (0.15 to 2.08)                                         |              |
| Smoking                                            | 183/499 (37)                                     | 281/944 (30)                                         | 1.56 (1.25 to 1.95)                          | †            | 1.00 (0.59 to 1.68)                                         |              |
| <b>Circumstances</b>                               |                                                  |                                                      |                                              |              |                                                             |              |
| High workload                                      | 274/494 (55)                                     | 538/934 (58)                                         | 1.14 (0.88 to 1.47)                          |              | 1.04 (0.68 to 1.59)                                         |              |
| Impression of sickness: ill                        | 295/480 (61)                                     | 319/901 (35)                                         | 3.04 (2.29 to 4.04)                          | †            | 2.28 (1.47 to 3.53)                                         | †            |
| Demand for antibiotics                             | 125/500 (25)                                     | 93/948 (10)                                          | 4.64 (2.96 to 7.26)                          | †            | 20.83 (8.86 to 48.99)                                       | †            |
| Demand for medication                              | 253/491 (52)                                     | 480/938 (51)                                         | 0.97 (0.74 to 1.26)                          |              | 0.98 (0.62 to 1.54)                                         |              |
| <b>Symptoms</b>                                    |                                                  |                                                      |                                              |              |                                                             |              |
| Mean (SD) duration of coughing (days)              | 6.45 (5.04)                                      | 5.35 (4.73)                                          | 1.05 (1.03 to 1.07)                          | †            | 1.04 (0.99 to 1.10)                                         |              |
| Sputum                                             | 374/500 (75)                                     | 458/942 (49)                                         | 3.04 (2.32 to 3.97)                          | †            | 2.52 (1.62 to 3.92)                                         | †            |
| Fever                                              | 166/500 (33)                                     | 243/943 (26)                                         | 1.49 (1.17 to 1.89)                          | †            | 1.11 (0.67 to 1.83)                                         |              |
| Runny nose                                         | 306/496 (62)                                     | 581/940 (62)                                         | 1.04 (0.79 to 1.37)                          |              | 0.96 (0.60 to 1.53)                                         |              |
| Headache                                           | 281/492 (57)                                     | 446/923 (48)                                         | 1.38 (1.12 to 1.71)                          | †            | 1.57 (1.03 to 2.37)                                         | †            |
| Muscle ache                                        | 175/486 (36)                                     | 301/925 (33)                                         | 1.27 (1.01 to 1.59)                          | †            | 0.75 (0.48 to 1.17)                                         |              |
| Sore throat                                        | 299/491 (61)                                     | 525/938 (56)                                         | 0.96 (0.77 to 1.19)                          |              | 1.22 (0.77 to 1.96)                                         |              |
| Wheezing                                           | 138/487 (28)                                     | 136/929 (15)                                         | 2.34 (1.78 to 3.07)                          | †            | 0.63 (0.34 to 1.17)                                         |              |
| Short of breath                                    | 185/487 (38)                                     | 216/927 (23)                                         | 2.38 (1.85 to 3.05)                          | †            | 1.27 (0.68 to 2.37)                                         |              |
| Chest pain                                         | 215/489 (44)                                     | 263/922 (29)                                         | 2.02 (1.61 to 2.52)                          | †            | 1.68 (1.07 to 2.65)                                         | †            |
| Loss of appetite                                   | 164/482 (34)                                     | 194/901 (22)                                         | 2.20 (1.69 to 2.87)                          | †            | 1.22 (0.74 to 2.02)                                         |              |
| Limited activity                                   | 255/488 (52)                                     | 374/915 (41)                                         | 1.92 (1.47 to 2.52)                          | †            | 1.73 (0.87 to 3.42)                                         |              |
| <b>Signs</b>                                       |                                                  |                                                      |                                              |              |                                                             |              |
| 'Higher risk'                                      | 212/500 (42)                                     | 323/948 (34)                                         | 1.38 (1.11 to 1.71)                          | †            | 1.21 (0.78 to 1.87)                                         |              |
| Mean (SD) number of abnormal auscultatory findings | 1.01 (1.09)                                      | 0.36 (0.75)                                          | 2.53 (2.02 to 3.18)                          | †            | 3.04 (2.03 to 4.54)                                         | †            |
| Percussion dullness                                | 9/473 (2)                                        | 6/889 (1)                                            | 6.15 (0.71 to 53.21)                         |              | 1.46 (0.15 to 13.80)                                        |              |
| <b>Test ordering</b>                               |                                                  |                                                      |                                              |              |                                                             |              |
| Radiograph                                         | 21/489 (4)                                       | 22/921 (2)                                           | 2.99 (1.49 to 6.03)                          | †            | 2.41 (0.58 to 10.06)                                        |              |
| Sputum analysis                                    | 7/487 (1)                                        | 8/917 (1)                                            | 2.90 (0.97 to 8.69)                          |              | 0.45 (0.07 to 2.82)                                         |              |
| Infection parameters                               | 17/485 (4)                                       | 13/915 (1)                                           | 3.72 (1.37 to 10.11)                         | †            | 28.04 (2.86 to 274.54)                                      | †            |
| Serology                                           | 6/480 (1)                                        | 12/914 (1)                                           | 1.72 (0.54 to 5.49)                          |              | 0.11 (0.01 to 1.31)                                         |              |
| Other                                              | 11/481 (2)                                       | 28/917 (3)                                           | 1.50 (0.73 to 3.06)                          |              | 1.76 (0.56 to 5.56)                                         |              |
| <b>Prescriptions</b>                               |                                                  |                                                      |                                              |              |                                                             |              |
| Referral                                           | 13/496 (3)                                       | 21/932 (2)                                           | 1.71 (0.98 to 3.00)                          |              | 0.04 (0.01 to 0.14)                                         | †            |
| Follow-up contact                                  | 69/479 (14)                                      | 68/880 (8)                                           | 3.06 (1.99 to 4.69)                          | †            | 2.18 (0.81 to 5.85)                                         |              |
| <b>GPs' characteristics</b>                        |                                                  |                                                      |                                              |              |                                                             |              |
| Men                                                | 385/500 (77)                                     | 674/948 (71)                                         | 1.31 (0.86 to 2.02)                          |              | 456.00 (0.04 to 4 930 000)                                  |              |
| UA graduate                                        | 198/500 (40)                                     | 433/948 (46)                                         | 0.84 (0.53 to 1.33)                          |              | 1.70 (0.71 to 4.09)                                         |              |
| Professional training                              | 111/456 (24)                                     | 259/890 (29)                                         | 0.85 (0.56 to 1.29)                          |              | 0.20 (0.10 to 0.42)                                         | †            |
| Fee for service                                    | 497/500 (99)                                     | 926/948 (98)                                         | 4.06 (2.64 to 6.23)                          | †            | 1.63 (0.10 to 26.09)                                        |              |
| Not single-handed                                  | 199/489 (41)                                     | 451/941 (48)                                         | 0.74 (0.48 to 1.15)                          |              | 0.51 (0.18 to 1.44)                                         |              |
| GPPTs in practice                                  | 66/500 (13)                                      | 197/948 (21)                                         | 0.65 (0.40 to 1.07)                          |              | 1.11 (0.28 to 4.36)                                         |              |
| Part-time                                          | 59/489 (12)                                      | 198/333 (21)                                         | 0.52 (0.32 to 0.86)                          | †            | 1.35 (0.35 to 5.16)                                         |              |
| <b>Province</b>                                    |                                                  |                                                      |                                              |              |                                                             |              |
| Antwerp                                            | 269 (54)                                         | 670 (71)                                             | 1                                            |              | 1                                                           |              |
| Brussels                                           | 41 (8)                                           | 28 (3)                                               | 3.38 (1.16 to 9.84)                          | †            | 29.20 (4.85 to 176.71)                                      | †            |
| Limburg                                            | 35 (7)                                           | 37 (4)                                               | 2.24 (0.86 to 5.89)                          |              | 2.75 (0.88 to 8.63)                                         |              |
| West Flanders                                      | 98 (20)                                          | 93 (10)                                              | 2.07 (1.25 to 3.43)                          | †            | 3.95 (1.60 to 9.76)                                         | †            |
| East Flanders                                      | 57 (11)                                          | 120 (13)                                             | 1.12 (0.60 to 2.11)                          |              | 1.88 (0.37 to 9.50)                                         |              |

Continued ...

**Table 2 continued. Predictors of the prescription of antibiotics by Flemish GPs in adult acute cough patients. Figures are numbers (%) unless stated otherwise.<sup>a</sup>**

|                                                                 | Prescribed antibiotics<br>(n = 500) <sup>a</sup> | Not prescribed antibiotics<br>(n = 948) <sup>a</sup> | Crude OR (95% CI) <sup>b</sup><br>(n = 1448) | Significance | Adjusted OR <sup>c</sup> (95% CI) <sup>b</sup><br>(n = 819) | Significance |
|-----------------------------------------------------------------|--------------------------------------------------|------------------------------------------------------|----------------------------------------------|--------------|-------------------------------------------------------------|--------------|
| Peak flow meter                                                 | 483/500 (97)                                     | 904/948 (95)                                         | 1.70 (0.98 to 2.96)                          |              | 3.43 (0.25 to 46.94)                                        |              |
| Spirometer                                                      | 93/500 (19)                                      | 303/948 (32)                                         | 0.61 (0.37 to 0.99)                          | †            | 0.44 (0.21 to 0.90)                                         | †            |
| Training practice                                               | 137/500 (27)                                     | 355/948 (37)                                         | 0.72 (0.46 to 1.13)                          |              | 1.32 (0.61 to 2.85)                                         |              |
| Academic link                                                   | 126/500 (25)                                     | 342/948 (36)                                         | 0.71 (0.46 to 1.11)                          |              | 1.44 (0.67 to 3.10)                                         |              |
| Records of home visits                                          | 376/500 (75)                                     | 808/948 (85)                                         | 0.61 (0.35 to 1.07)                          |              | 1.38 (0.68 to 2.81)                                         |              |
| Computerised records                                            | 333/500 (67)                                     | 663/948 (70)                                         | 1.08 (0.65 to 1.80)                          |              | 1.28 (0.60 to 2.72)                                         |              |
| Complementary medicine                                          | 8/500 (2)                                        | 29/948 (3)                                           | 0.53 (0.40 to 0.70)                          |              | 0.20 (0.04 to 1.15)                                         |              |
| Year of birth                                                   | 55.99 (7.64)                                     | 55.56 (8.39)                                         | 1.01 (0.99 to 1.03)                          |              | 1.22 (1.01 to 1.47)                                         | †            |
| Mean (SD) number of patient encounters per week                 | 112.14 (46.08)                                   | 101.06 (40.08)                                       | 1.01 (1.00 to 1.01)                          | †            | 1.00 (0.99 to 1.02)                                         |              |
| Mean (SD) number of home visits per week                        | 38.63 (18.80)                                    | 30.53 (17.41)                                        | 1.02 (1.01 to 1.03)                          | †            | 1.03 (1.00 to 1.06)                                         |              |
| Mean (SD) number of medical representatives/month               | 15.82 (8.18)                                     | 15.27 (11.89)                                        | 1.01 (0.98 to 1.04)                          |              | 1.04 (0.98 to 1.10)                                         |              |
| Mean (SD) ATC J cost ratio                                      | 16.54 (6.64)                                     | 14.28 (6.23)                                         | 1.05 (1.02 to 1.08)                          | †            | 0.94 (0.84 to 1.06)                                         |              |
| Mean (SD) ATC J volume ratio                                    | 3.60 (1.44)                                      | 2.91 (1.28)                                          | 1.35 (1.19 to 1.53)                          | †            | 1.58 (0.97 to 2.57)                                         |              |
| <b>Design</b>                                                   |                                                  |                                                      |                                              |              |                                                             |              |
| Registration year: 2001                                         | 190/500 (38)                                     | 481/948 (51)                                         | 0.64 (0.52 to 0.80)                          | †            | 0.74 (0.42 to 1.28)                                         |              |
| Registration group: intervention                                | 227/500 (45)                                     | 406/948 (43)                                         | 0.99 (0.63 to 1.55)                          |              | 0.75 (0.32 to 1.78)                                         |              |
| Year*group: 2001*intervention                                   | 78/190 (41)                                      | 206/481 (43)                                         | 0.57 (0.40 to 0.82)                          | †            | 0.72 (0.23 to 2.29)                                         |              |
| <b>Interaction terms of final model</b>                         |                                                  |                                                      |                                              |              |                                                             |              |
| Demand for antibiotics*number of abnormal auscultatory findings |                                                  |                                                      | 1.76 (1.30 to 2.38)                          |              | 0.23 (0.13 to 0.41)                                         |              |
| Patient sex*age                                                 |                                                  |                                                      | 1.00 (1.00 to 1.01)                          |              | 0.98 (0.96 to 1.01)                                         |              |
| GP's sex*year of birth                                          |                                                  |                                                      | 1.01 (1.00 to 1.01)                          |              | 0.90 (0.76 to 1.06)                                         |              |

ACE = angiotensin converting enzyme. ATC J = Anatomical Therapeutic Chemical J. GPPT = GP in professional training. SD = standard deviation. UA = University of Antwerp. <sup>a</sup>Denominators vary due to missing values. <sup>b</sup>Score test using alternating logistic regression; †P < 0.05. <sup>c</sup>Adjusted for all variables in the final model. dGPs in professional training.
