# Supplementary material
Source: PubMed Central journal article supplement (PMC1828261)
Supplement: bjpg56-183TableS2.pdf [file bjpg56-183TableS2.pdf]

**Supplementary Table 2. Predictors of the prescription of antibiotics by Flemish general practitioners (GPs) in adults acute cough patients. Categorical variables and continuous variables converted into categorical data. Figures are numbers (percentage) of adults.<sup>a</sup>**

|                                                            | Prescribed antibiotics | Not prescribed antibiotics | Crude odds ratio (95% CI) <sup>b</sup> | Significance |
|------------------------------------------------------------|------------------------|----------------------------|----------------------------------------|--------------|
| <b>Demographics</b>                                        |                        |                            |                                        |              |
| Age in years                                               |                        |                            | 1.01 (1.00 to 1.02)                    | †            |
| Age in years <sup>c</sup>                                  |                        |                            | 1.11 (1.02 to 1.21)                    | †            |
| 18–35                                                      | 176 (35)               | 385 (41)                   | 1                                      |              |
| 36–45                                                      | 128 (26)               | 239 (25)                   | 1.16 (0.94 to 1.44)                    |              |
| 46–55                                                      | 97 (20)                | 178 (19)                   | 1.19 (0.92 to 1.52)                    |              |
| 56–65                                                      | 95 (19)                | 141 (15)                   | 1.40 (1.05 to 1.86)                    | †            |
| <b>Symptoms</b>                                            |                        |                            |                                        |              |
| Duration of coughing (days)                                |                        |                            | 1.05 (1.03 to 1.07)                    | †            |
| Duration of coughing (days) <sup>c</sup>                   |                        |                            | 1.22 (1.12 to 1.32)                    | †            |
| 1–3                                                        | 190 (38)               | 451 (48)                   | 1                                      |              |
| 4–6                                                        | 115 (23)               | 232 (24)                   | 1.28 (1.01 to 1.64)                    | †            |
| 7–9                                                        | 81 (16)                | 126 (13)                   | 1.80 (1.32 to 2.46)                    | †            |
| 10–12                                                      | 27 (5)                 | 41 (4)                     | 1.76 (1.00 to 3.10)                    | †            |
| >12                                                        | 87 (17)                | 98 (10)                    | 2.12 (1.51 to 2.98)                    | †            |
| <b>Signs</b>                                               |                        |                            |                                        |              |
| Number of abnormal auscultatory findings <sup>d</sup>      |                        |                            | 2.53 (2.02 to 3.18)                    | †            |
| 0                                                          | 216 (43)               | 729 (77)                   | 1                                      |              |
| 1                                                          | 128 (26)               | 129 (14)                   | 3.49 (2.50 to 4.87)                    | †            |
| 2                                                          | 98 (20)                | 60 (6)                     | 6.85 (4.26 to 11.02)                   | †            |
| 3                                                          | 49 (10)                | 27 (3)                     | 11.80 (6.06 to 22.99)                  | †            |
| 4                                                          | 9 (2)                  | 3 (0)                      | 25.73 (1.00 to 660.11)                 | †            |
| <b>GPs' characteristics</b>                                |                        |                            |                                        |              |
| Year of birth                                              |                        |                            | 1.01 (0.99 to 1.03)                    |              |
| Year of birth <sup>e</sup>                                 |                        |                            | 0.88 (0.70 to 1.11)                    |              |
| 74–65                                                      | 71 (14)                | 98 (10)                    | 1                                      |              |
| 64–55                                                      | 210 (42)               | 432 (46)                   | 0.67 (0.41 to 1.09)                    |              |
| 54–45                                                      | 202 (40)               | 364 (38)                   | 0.74 (0.45 to 1.21)                    |              |
| 44–25                                                      | 17 (3)                 | 54 (6)                     | 0.46 (0.28 to 0.74)                    |              |
| Average number of patient encounters per week              |                        |                            | 1.01 (1.00 to 1.01)                    | †            |
| Average number of patient encounters per week <sup>c</sup> |                        |                            | 1.34 (1.07 to 1.69)                    | †            |
| <51                                                        | 56 (11)                | 98 (10)                    | 1                                      |              |
| 51–100                                                     | 182 (36)               | 527 (56)                   | 0.62 (0.38 to 1.03)                    |              |
| 101–150                                                    | 189 (38)               | 219 (23)                   | 1.36 (0.76 to 2.43)                    |              |
| 151–200                                                    | 48 (10)                | 86 (9)                     | 1.26 (0.58 to 2.71)                    |              |
| >200                                                       | 25 (5)                 | 18 (2)                     | 2.35 (1.59 to 3.49)                    | †            |
| Average number of home visits per week                     |                        |                            | 1.02 (1.01 to 1.03)                    | †            |
| Average number of home visits per week <sup>c</sup>        |                        |                            | 1.38 (1.17 to 1.63)                    | †            |
| <11                                                        | 31 (6)                 | 105 (12)                   | 1                                      |              |
| 11–20                                                      | 62 (13)                | 180 (20)                   | 1.21 (0.56 to 2.61)                    |              |
| 21–30                                                      | 123 (25)               | 328 (36)                   | 1.26 (0.65 to 2.46)                    |              |
| 31–40                                                      | 83 (17)                | 130 (14)                   | 2.42 (1.14 to 5.17)                    | †            |
| >40                                                        | 193 (39)               | 168 (18)                   | 3.14 (1.54 to 6.43)                    | †            |

Continued ...

**Supplementary Table continued. Predictors of the prescription of antibiotics by Flemish general practitioners (GPs) in adults acute cough patients. Categorical variables and continuous variables converted into categorical data. Figures are numbers (percentage) of adults.<sup>a</sup>**

|                                                              | Prescribed antibiotics | Not prescribed antibiotics | Crude odds ratio (95% CI) <sup>b</sup> | Significance |
|--------------------------------------------------------------|------------------------|----------------------------|----------------------------------------|--------------|
| Average number of medical representatives/month              |                        |                            | 1.01 (0.98 to 1.04)                    |              |
| Average number of medical representatives/month <sup>c</sup> |                        |                            | 1.21 (1.01 to 1.46)                    | †            |
| 0–5                                                          | 28 (6)                 | 104 (11)                   | 1                                      |              |
| 5–10                                                         | 95 (21)                | 244 (27)                   | 1.69 (0.77 to 3.69)                    |              |
| 11–15                                                        | 58 (13)                | 155 (17)                   | 1.49 (0.70 to 3.15)                    |              |
| 16–20                                                        | 183 (41)               | 233 (26)                   | 2.62 (1.18 to 5.82)                    | †            |
| >20                                                          | 84 (19)                | 171 (19)                   | 2.23 (0.85 to 5.84)                    |              |
| ATC J cost ratio <sup>e</sup>                                |                        |                            | 1.05 (1.02 to 1.08)                    | †            |
| ATC J cost ratio <sup>e,a</sup>                              |                        |                            | 1.34 (1.15 to 1.56)                    | †            |
| <8.1                                                         | 20 (4)                 | 94 (11)                    | 1                                      |              |
| 8.1–12                                                       | 94 (20)                | 266 (30)                   | 2.08 (0.93 to 4.63)                    |              |
| 12.1–16                                                      | 128 (28)               | 257 (29)                   | 2.88 (1.28 to 6.45)                    | †            |
| 16.1–20                                                      | 125 (27)               | 127 (14)                   | 3.92 (1.73 to 8.86)                    | †            |
| >20                                                          | 95 (21)                | 141 (16)                   | 3.96 (1.91 to 8.21)                    | †            |
| ATC J volume ratio <sup>e</sup>                              |                        |                            | 1.35 (1.19 to 1.53)                    | †            |
| ATC J volume ratio <sup>e,a</sup>                            |                        |                            | 1.44 (1.24 to 1.66)                    | †            |
| <2.1                                                         | 31 (7)                 | 146 (17)                   | 1                                      |              |
| 2.1–3                                                        | 140 (32)               | 358 (41)                   | 2.46 (1.23 to 4.94)                    | †            |
| 3.1–4                                                        | 111 (25)               | 220 (25)                   | 2.40 (1.10 to 5.24)                    | †            |
| 4.1–5                                                        | 68 (16)                | 61 (7)                     | 5.27 (2.28 to 12.16)                   | †            |
| >5                                                           | 87 (20)                | 82 (9)                     | 5.42 (2.74 to 10.71)                   | †            |

† means  $P < 0.05$ . <sup>a</sup>Denominators vary due to missing values. <sup>b</sup>Score test using alternative logistic regression. <sup>c</sup>Categorical variable or continuous variable converted to categorical variable analysed as an ordinal variable not as a class variable. <sup>d</sup>Less vesicular breathing, wheezing, ronchi or crepitations. <sup>e</sup>The ratios of the gross amount for antimicrobials for systemic use (ATC J)/the gross amount for all pharmaceutical specialties and the volume (Daily Defined Dosage [DDD]) of ATC J/the volume for all pharmaceutical specialties are both expressed as percentages on individual prescribing feedback from the National Sickness and Invalidity Institution (NSII) to GPs.
